# Supplementary material for: Disease Gene Characterization through Large-Scale Co-Expression Analysis
Source: PLoS One. 2009 Dec 31;4(12):e8491. doi: 10.1371/journal.pone.0008491 (PMC2797297; doi:10.1371/journal.pone.0008491)
Supplement: Table S1 — Representative genes are listed in rank order of mean similarity to the human cartilage-selective seeding profile identified in Figure 1 and represented in Column 1. Column 6 identifies genes, labeled with an X, which can result in skeletal abnormalities in humans [32]. Column 7 identifies associated mouse phenotypes summarized from Mouse Genome Database [33] (“N/A” indicates targeted model not available; “-” targeted mouse model has no skeletal phenotype yet). Column 8 indicates genes that were similarly identified in the mouse from Affy 430 2.0 whole genome array data as being in the top 100 cartilage selective genes. Column 8 indicates genes which are previously identified in Funari et al., 2007 et. al. as cartilage-selective. Column 9 indicates genes identified in Funari et al., 2007 as enriched in cartilage using data from the U133 2.0 platform and the first 200 ranked genes with a false discovery rate of zero using Significance of Microarray (SAM) analysis. (0.04 MB XLS) [file pone.0008491.s001.xls]

## Sheet: Sheet1
						Skeletal Phenotype			Mouse	Funari et. al., 2007
Profile (Seed list)	#RANK		Probe Set ID	Gene Symbol	Mean	Human		Mouse Model	UGET Profile	CV+ FOLD		SAM analysis
LIF	1		222008_at	COL9A1	0.9	X	Cart Dev		X	X	X
NOS2A	2		217404_s_at	COL2A1	0.9	X	Cart Dev		X		X
MMP13	3		213870_at	COL11A2	0.9	X	Cart Dev		X	X	X
CSPG4	4		207692_s_at	ACAN	0.9	X	Cart Dev		X	X	X
ACAN	5		205679_x_at	ACAN	0.9	X	Cart Dev		X	X	X
COL11A2	6		236800_at	C10orf49	0.9		N/A			X	X
COL9a1	7		206905_s_at	MATN1	0.89		Cart Dev		X	X	X
MATN1	8		216993_s_at	COL11A2	0.89	X	Cart Dev		X	X	X
LECT1	9		213492_at	COL2A1	0.88	X	Cart Dev		X		X
MATN4	10		217161_x_at	ACAN	0.88	X	Cart Dev		X	X	X
HAPLN1	11		206309_at	LECT1	0.87	X	Bone		X	X	X
ITGA10	12		213622_at	COL9A2	0.86	X	N/A		X	X	X
EDIL3	13		205524_s_at	HAPLN1	0.84		Cart Dev		X	X	X
NGF	14		214297_at	CSPG4	0.81		-		X	X	X
	15		230204_at	---	0.79		N/A			X	X
	16		230895_at	---	0.79		N/A			X	X
	17		204736_s_at	CSPG4	0.77		-		X	X	X
	18		207123_s_at	MATN4	0.77		N/A		X	X	X
	19		205959_at	MMP13	0.75	X	Cart Dev		X	X	X
	20		205523_at	HAPLN1	0.75		Cart Dev		X	X	X
	21		204724_s_at	COL9A3	0.72		N/A		X		X
	22		210037_s_at	NOS2A	0.72		Skeletal			X	X
	23		207639_at	FZD9	0.67		Skeletal		X		X
	24		220117_at	ZNF385D	0.66		-				X
	25		219516_at	TRPV4	0.65	X	-
	26		232805_at	---	0.64		N/A				X
	27		1552288_at	CILP2	0.63		N/A			X	X
	28		229271_x_at	COL11A1	0.62	X	Cart Dev		X	X	X
	29		205290_s_at	BMP2	0.62	X	Cart Dev			X	X
	30		1554008_at	OSMR	0.62		-			X	X
	31		205266_at	LIF	0.62		-			X	X
	32		232061_at	SDK2	0.6		N/A
	33		206766_at	ITGA10	0.59	X	Cart Dev		X	X	X
	34		241383_at	ZNF385C	0.59		N/A			X	X
	35		205713_s_at	COMP	0.57	X	Cart Dev		X		X
	36		207379_at	EDIL3	0.57		N/A			X	X
	37		1561886_a_at	---	0.57		N/A				X
	38		206814_at	NGF	0.57		Skeletal			X	X
	39		1552289_a_at	CILP2	0.55		N/A			X	X
	40		204926_at	INHBA	0.53		Skeletal				X
	41		37892_at	COL11A1	0.52	X	Cart Dev		X	X	X
	42		205289_at	BMP2	0.52	X	Cart Dev			X	X
	43		219693_at	AGPAT4	0.52		N/A				X
	44		1558643_s_at	EDIL3	0.52		-			X	X
	45		205828_at	MMP3	0.51		Adult Cart			X	X
	46		233668_at	---	0.51		N/A			X
	47		1555434_a_at	SLC39A14	0.51		N/A
	48		215485_s_at	ICAM1	0.5		-				X
	49		206439_at	EPYC	0.49		N/A		X	X	X
	50		234073_at	---	0.49		N/A
	51		1562208_a_at	---	0.49		N/A			X
	52		222348_at	MAST4	0.49		N/A			X
	53		205021_s_at	FOXN3	0.48		N/A
	54		242064_at	SDK2	0.47		N/A
	55		203935_at	ACVR1	0.47		Cart Dev
	56		228407_at	SCUBE3	0.47		N/A			X	X
	57		1555468_at	NRP2	0.47		Skeletal			X	X
	58		232668_at	---	0.47		N/A			X
	59		225288_at	COL27A1	0.47		N/A		X	X	X
	60		204345_at	COL16A1	0.46		N/A		X
	61		206924_at	IL11	0.46		Skeletal				X
	62		228750_at	---	0.44		N/A
	63		202638_s_at	ICAM1	0.44		-				X
	64		211170_s_at	PDE10A	0.44		-				X
	65		204320_at	COL11A1	0.44	X	Cart Dev		X	X	X
	66		242029_at	FNDC3B	0.43		N/A			X	X
	67		214954_at	SUSD5	0.43		N/A		X		X
	68		206091_at	MATN3	0.42	X	Cart Dev		X	X	X
	69		202637_s_at	ICAM1	0.42		-				X
	70		230290_at	SCUBE3	0.41		N/A			X	X
	71		232113_at	---	0.41		N/A
	72		225292_at	COL27A1	0.41		N/A		X		X
	73		1552737_s_at	WWP2	0.4		N/A		X	X	X
	74		218691_s_at	PDLIM4	0.4		N/A			X	X
	75		228082_at	ASAM	0.4		N/A			X	X
	76		232453_at	---	0.39		N/A				X
	77		232701_at	---	0.39		N/A			X	X
	78		206904_at	MATN1	0.39		Cart Dev		X	X	X
	79		230773_at	---	0.39		N/A
	80		1555009_a_at	SYNJ2	0.39		N/A			X
	81		212865_s_at	COL14A1	0.39		N/A				X
	82		233364_s_at	---	0.38		N/A
	83		219201_s_at	TWSG1	0.38	X	Skeletal				X
	84		222942_s_at	TIAM2	0.38		N/A
	85		225293_at	COL27A1	0.38		N/A		X	X	X
	86		1553740_a_at	IRAK2	0.38		N/A			X	X
	87		241452_at	---	0.38		N/A
	88		233090_at	---	0.37		N/A				X
	89		1557123_a_at	CHADL	0.37		N/A			X	X
	90		235831_at	---	0.37		N/A
	91		212110_at	SLC39A14	0.37		N/A				X
	92		215209_at	SEC24D	0.37		N/A				X
	93		232955_at	FLJ41170	0.36		N/A				X
	94		233691_at	---	0.36		N/A
	95		238009_at	---	0.36		N/A
	96		213497_at	ABTB2	0.36		N/A				X
	97		232472_at	---	0.34		N/A			X
	98		206560_s_at	MIA	0.34		Cart Dev			X	X
	99		236438_at	---	0.34		N/A
	100		206176_at	BMP6	0.34	X	Skeletal			X	X
